# Supplementary material for: All-trans retinoic acid modulates pigmentation, neuroretinal maturation, and corneal transparency in human multiocular organoids
Source: PubMed Central journal article supplement (PMC9330659; doi:10.1186/s13287-022-03053-1), 2022-07-28
Supplement: 13287_2022_3053_MOESM1_ESM.pdf [file 13287_2022_3053_MOESM1_ESM.pdf]

**All-trans retinoic acid modulates pigmentation, neuroretinal maturation, and corneal transparency in human multiocular organoids.**

Helena Isla-Magrané, Maddalen Zufiaurre, José García-Arumí, Anna Duarri\*

Tables: 2

Figures: 4

**Supplementary Table S1: List of primary antibodies**

| <b>Antibody</b>         | <b>Supplier and reference</b>         | <b>Species</b> | <b>Dilution (IF/WB)</b> |
|-------------------------|---------------------------------------|----------------|-------------------------|
| <b>Actin</b>            | MP Biomedicals, 691001                | Mouse          | - / 1:1000              |
| <b>Bestrophin</b>       | Santa Cruz Biotechnology, sc-32792    | Mouse          | 1:25                    |
| <b>B-Op sin</b>         | Millipore, AB5407                     | Rabbit         | 1:100                   |
| <b>Collagen type IV</b> | Abcam, ab6586                         | Rabbit         | 1:100 / 1:1000          |
| <b>CRALBP</b>           | Santa Cruz Biotechnology, sc-28193    | Rabbit         | - / 1:500               |
| <b>Cytokeratin 19</b>   | Genetex, GTX112666                    | Rabbit         | 1:100 / 1:1000          |
| <b>Cytokeratin 3/2p</b> | Santa Cruz Biotechnology, sc-80000    | Mouse          | 1:100                   |
| <b>Cytokeratin 5</b>    | Abcam, ab24647-50                     | Rabbit         | 1:100                   |
| <b>MUC1</b>             | Genetex, GTX100459                    | Rabbit         | 1:100                   |
| <b>Recoverin</b>        | Millipore, AB5585                     | Rabbit         | 1:500 / 1:5000          |
| <b>RG-Op sin</b>        | Millipore, AB5405                     | Rabbit         | 1:100                   |
| <b>Rhodopsin</b>        | Sigma, O4886                          | Mouse          | 1:500                   |
| <b>RPE65</b>            | Santa Cruz Biotechnology, sc-73616    | Mouse          | 1:100                   |
| <b>SSEA1</b>            | Iowa, MC-480                          | Mouse          | 1:2                     |
| <b>Tuj1</b>             | Covance, MMS-435P                     | Mouse          | 1:1000                  |
| <b>Vimentin</b>         | Cell signaling kit Arigobio, SQab1721 | Rabbit         | 1:100 / 1:1000          |
| <b>ZO-1</b>             | Millipore, ab2272                     | Rabbit         | 1:100                   |

**Supplementary Table S2: List of primers used in PCR and qPCR**

| <b>Gene</b>             | <b>Forward</b>           | <b>Reverse</b>           |
|-------------------------|--------------------------|--------------------------|
| <b><i>CK12</i></b>      | AGCAGAATCGGAAGGACGCTG    | ACCTCGCTCTTGCTGGACTGAAA  |
| <b><i>CK19</i></b>      | ACAGCCACTACTACACGACC     | CCTGTTCCGTCTCAAACCTGGT   |
| <b><i>CRABP2</i></b>    | TCGGAAAACCTTCGAGGAATTGC  | CCTGTTTGATCTCCACTGCTG    |
| <b><i>CRX</i></b>       | TCCAGGGTTCAGGTTTGGTT     | CATCTGTGGAGGGTCTTGGG     |
| <b><i>CYP26A1</i></b>   | CACCGTACGGGTGATGGGCG     | GCTGGCCAGTGGACCGACAC     |
| <b><i>CYP26B1</i></b>   | ACCGGCCACTGGCTGCTG       | ACGTTGATGGCCTCGGGGTG     |
| <b><i>GAPDH</i></b>     | CCTGCACCACCAACTGCTTAG    | TGGCATGGACTGTGGTCATG     |
| <b><i>MITF</i></b>      | GTGCCAACTTCTTTCATCA      | ACCTAAACCGTCCATTCA       |
| <b><i>OPN1SW</i></b>    | TAGCAGGTCTGGTTACAGGATG   | GAGACGCCAATACCAATGGTC    |
| <b><i>P63</i></b>       | GAAAACAATGCCAGACTCAATTT  | TCTGCGCGTGGTCTGTGTTAT    |
| <b><i>PAX6</i></b>      | TCTAATCGAAGGGCCAAATG     | TGTGAGGGCTGTGTCTGTTC     |
| <b><i>PEDF</i></b>      | AGATCTCAGCTGCAAGATTGCCCA | ATGAATGAACTCGGAGGTGAGGCT |
| <b><i>PPARG</i></b>     | TACTGTTCGGTTTCAGAAATGCC  | GTCAGCGGACTCTGGATTCAG    |
| <b><i>RARA</i></b>      | GGGCAAATACACTACGAACAACA  | CTCCACAGTCTTAATGATGCACT  |
| <b><i>RARB</i></b>      | TCCGAAAAGCTCACCAGGAAA    | GGCCAGTTCACTGAATTTGTCC   |
| <b><i>RARG</i></b>      | ATGCTGCGTATCTGCACAAG     | AGGCAAAGACAAGGTCTGTGA    |
| <b><i>RARRES1</i></b>   | AAACCCCTTGAAATAGTCAGC    | GGAAAGCCAAATCCCAGATGAG   |
| <b><i>RECOVERIN</i></b> | TCTACGACGTGGACGGTAACG    | CGTCCTCGGGAGTGATCATT     |
| <b><i>RHODOPSIN</i></b> | GCTGGTCCAGGTACATCCCC     | TGAAGACGAGCTGCCCATAG     |
| <b><i>RXRA</i></b>      | ATGGACACCAAACATTTCTGTC   | GGGAGCTGATGACCGAGAAAG    |
| <b><i>RXRB</i></b>      | ACGGCTATGTGCAATCTGC      | CGGATGGTGCGTTTGAAGAA     |
| <b><i>RXRG</i></b>      | CCGGATCTCTGGTTAAACACATC  | GTCCTTCCTTATCGTCCTCTTGA  |
| <b><i>SIL</i></b>       | GTTGATGGCTGTGGTCCTTG     | CAGTGACTGCTGCTATGTGG     |
| <b><i>TYR</i></b>       | ACTTACTCAGCCCAGCATC      | GGTTTCCAGGATTACGCC       |

FIGURE S1

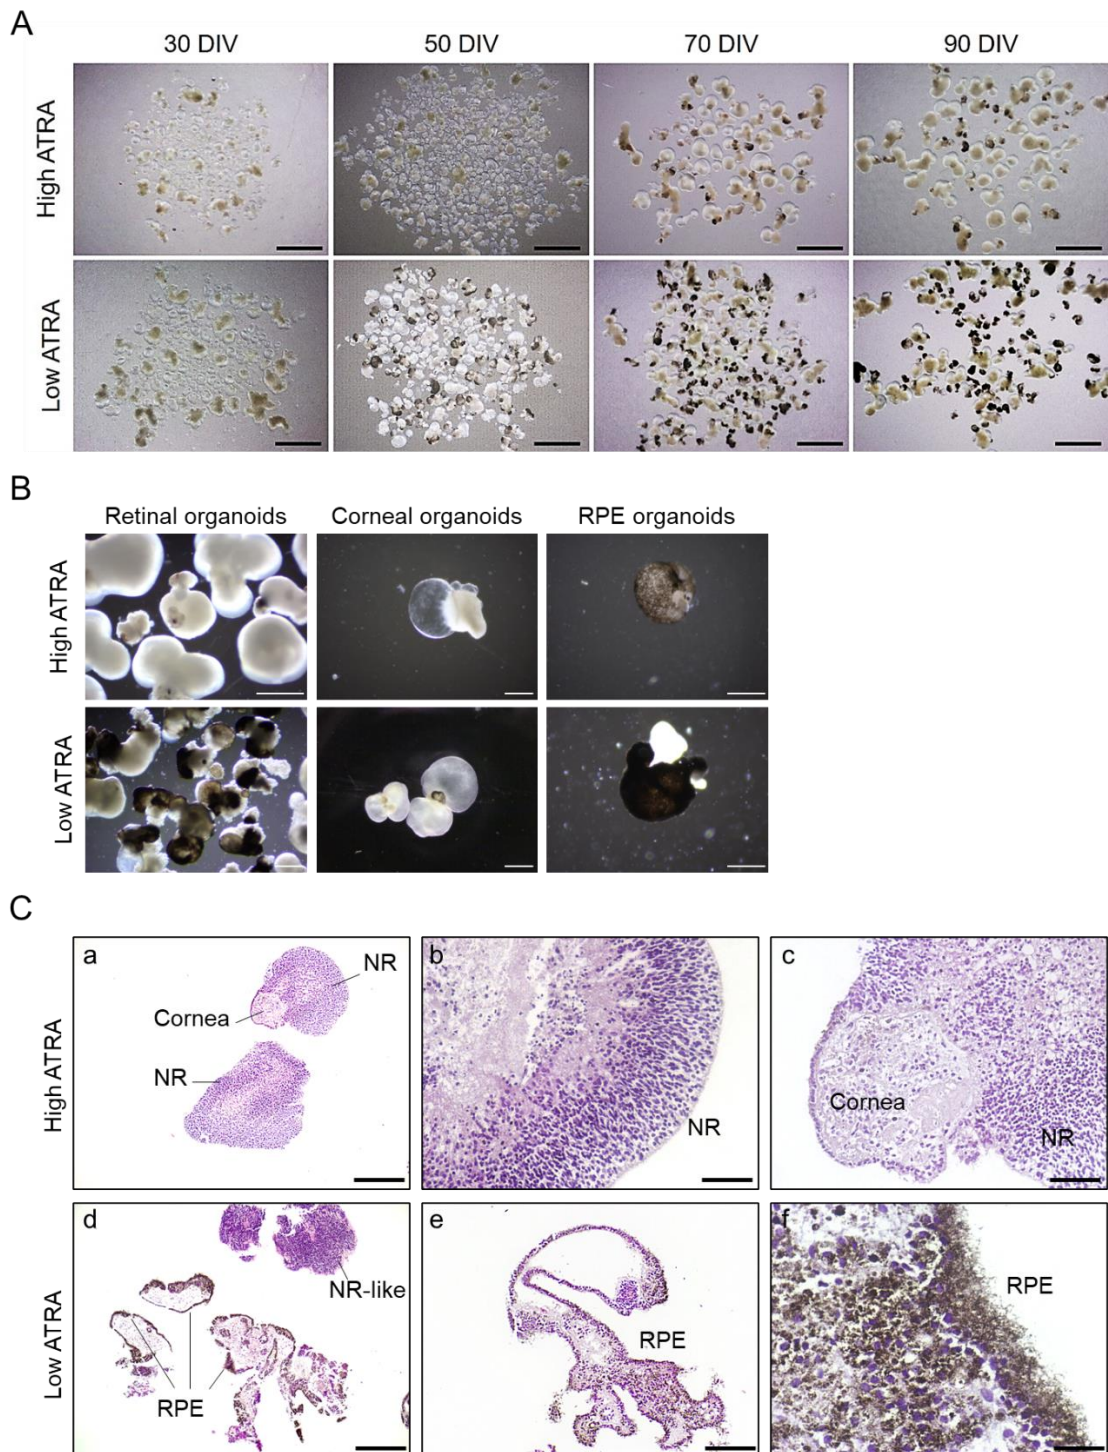

**Figure S1: Low all-trans retinoic acid induces pigmentation in hiPSC-derived multicellular organoids.** A) Representative images of multicellular organoids in suspension, cultured in low or high all-trans retinoic acid (ATRA) concentrations at 30, 50, 70, and 90 days *in vitro* (DIV). Scale bars: 3 mm. B) Representative images of individual organoids. Scale bars: 500  $\mu$ m. C) Hematoxylin and eosin staining of paraffin sections showing a predominant neuroretinal (NR) and corneal organoids in high ATRA conditions and mostly retinal pigment epithelial (RPE) organoids in low ATRA conditions. Scale bars: 250  $\mu$ m (a,d,e); 50  $\mu$ m (b,c); 25  $\mu$ m (f).

FIGURE S2

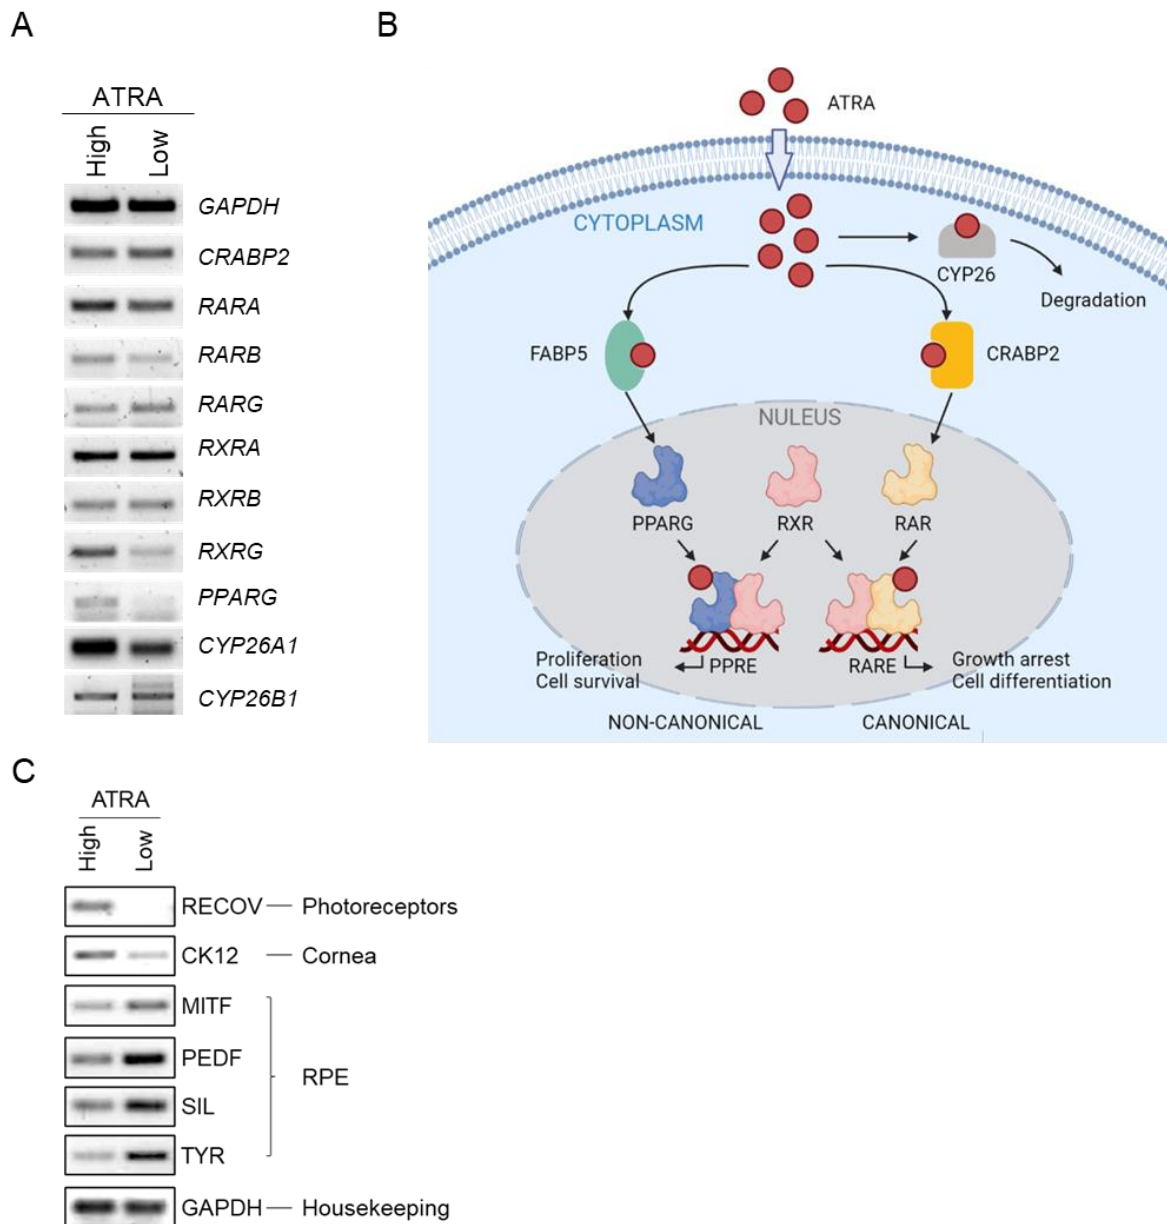

**Figure S2: All-trans retinoic acid pathway.** A) Analysis of mRNA expression by PCR of the indicated genes in multicellular organoids cultured in high and low ATRA concentrations. *GAPDH* levels are shown as a loading control. B) Scheme showing ATRA signaling pathway. ATRA is diffused inside the cytoplasm and transported into the nucleus by retinoic acid-binding proteins (CRABPs). Then, ATRA binds to the retinoic acid receptor (RAR) that in turn forms heterodimers with retinoid X receptor (RXR), binding to retinoic acid response elements (RAREs) initiation of gene transcription. Alternatively, ATRA can bind the peroxisome proliferator-activated receptor gamma (PPAR). Activated receptors form heterodimers with RXR and bind to the PPAR response element (PPRE). The excess ATRA is degraded by the cytochrome P450 family (CYP26) proteins, which oxidize ATRA to various inactive metabolites. C) Gene transcripts analysis by PCR of ocular-specific regions. *GAPDH* was used as a housekeeping gene.

FIGURE S3

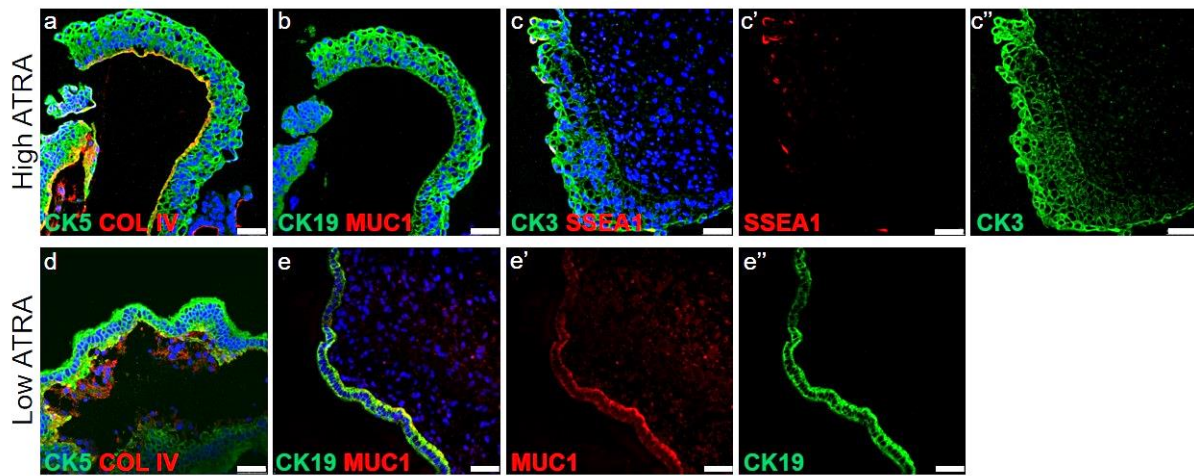

**Figure S3: Corneal organoids treated with low and high ATRA concentrations.** Immunofluorescent images of corneal organoid paraffin sections stained with CK3 (corneal marker), CK5 and CK19 (corneal-conjunctival marker), SSEA1 (limbal stem cell marker), and MUC1 (mucin 1, goblet cell marker). Scale bars: 50  $\mu$ m.

FIGURE S4

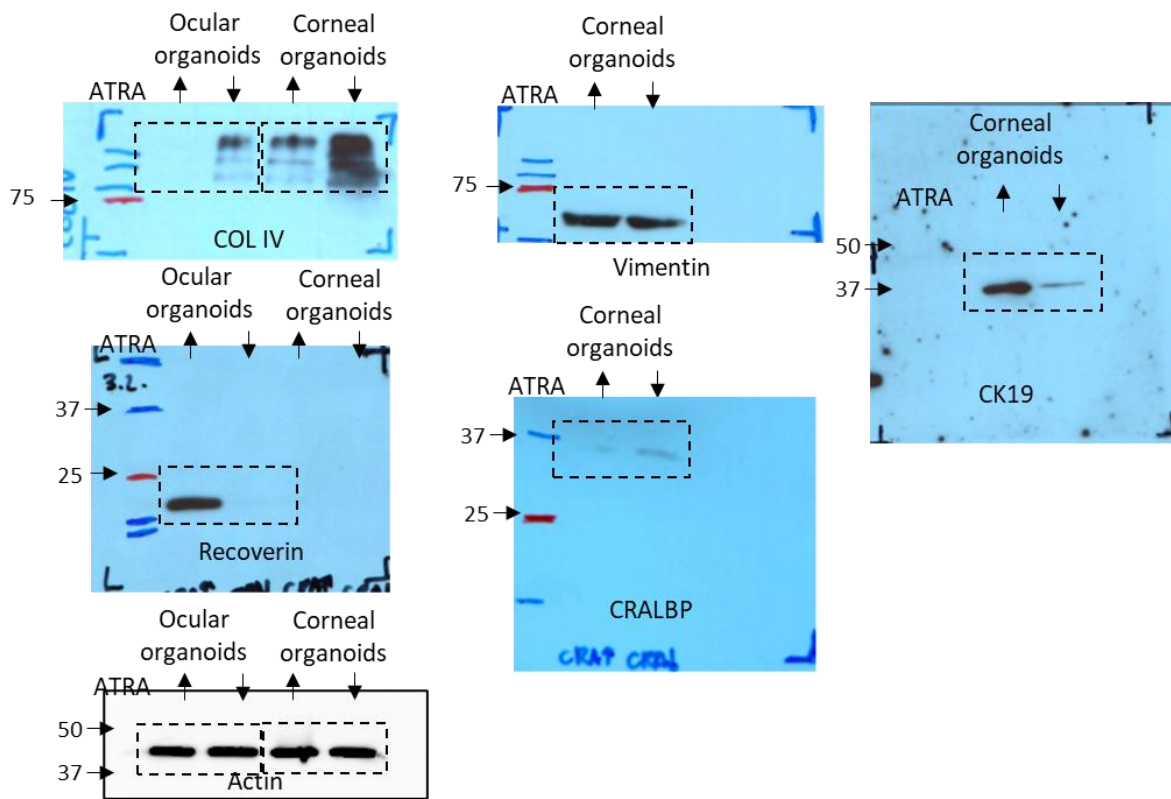

**Figure S4: Full scans of Western blot data.** Full scans of Western blot of Figure 2 (Collagen type IV, Recoverin, and actin) and Figure 4 (Collagen type IV, Vimentin, CRALBP, CK19, and actin). Due to the low protein concentration obtained from ocular and corneal organoids, Western blot membranes were cropped before the immunoblotting to maximize the antibodies used for each membrane. Actin was revealed using ImageQuant LAS 4000 (GE Healthcare). Dashed squares represent the images of bands shown in the corresponding figure.
